# Supplementary material for: Honokiol Induces Ferroptosis by Upregulating HMOX1 in Acute Myeloid Leukemia Cells
Source: PubMed Central journal article supplement (PMC9132251; doi:10.3389/fphar.2022.897791), 2022-05-11
Supplement: Image3.pdf [file Image3.pdf]

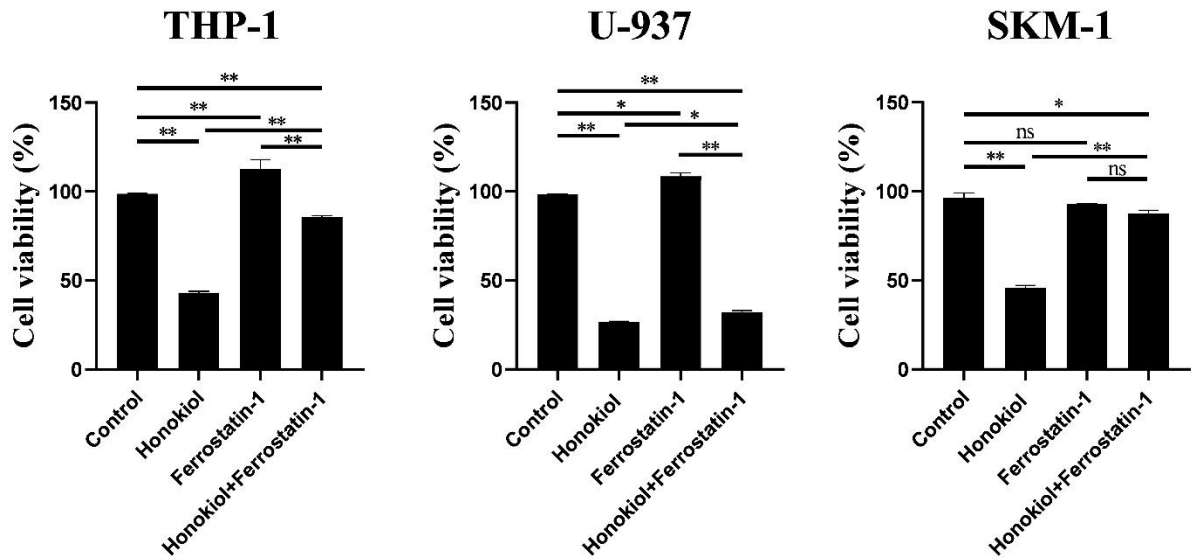

**Figure S3. The effect of honokiol on cell death following ferroptosis inhibition.**

THP-1, U-937 and SKM-1 cells were pretreated with Ferrostatin-1 (5 $\mu$ M) for 2 h, then honokiol (20 $\mu$ M for THP-1, 35 $\mu$ M for U-937 and 30 $\mu$ M for SKM-1) was added to the cell culture and incubated for 24 h. Four hours before ending the incubation, 10  $\mu$ L of CCK-8 reagent was added to each well. Four hours later, the absorbance was measured at 450 nm using a microplate reader and cell viability was calculated. As shown in Figure S3, the ferroptosis inhibitor ferrostatin-1 partially rescued honokiol-induced cell death in THP-1, U-937 and SKM-1 cells, suggesting that these cells underwent ferroptosis after honokiol treatment. Three replicated experiments were performed and the bar chart represents mean $\pm$ SD of cell viability of each cell line after treatment as indicated. \* $P$ <0.05, \*\* $P$ <0.01 by statistical analysis.
